# Supplementary material
Source: ML conference proceedings conference paper supplement (https://openreview.net/forum?id=rI0LYgGeYaw)

Spatial pattern 0

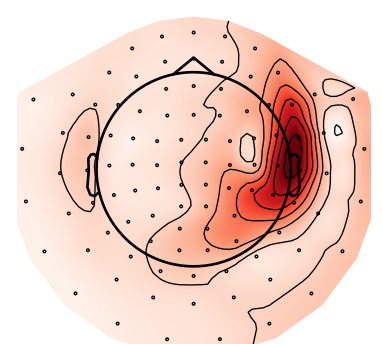

Spatial pattern 1

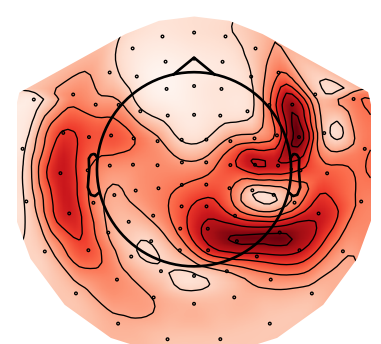

Spatial pattern 2

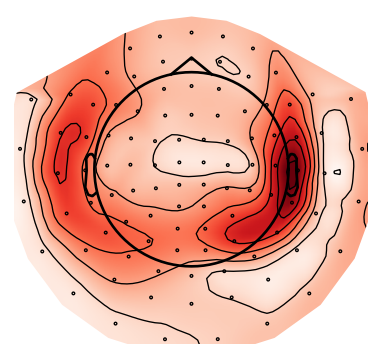

Spatial pattern 3

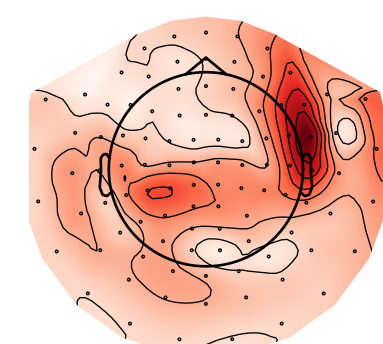

Spatial pattern 4

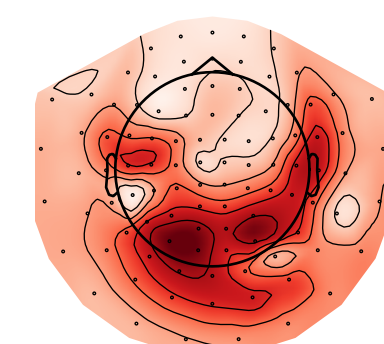

Spatial pattern 5

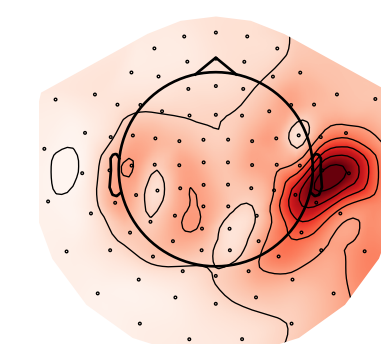

Temporal pattern 0

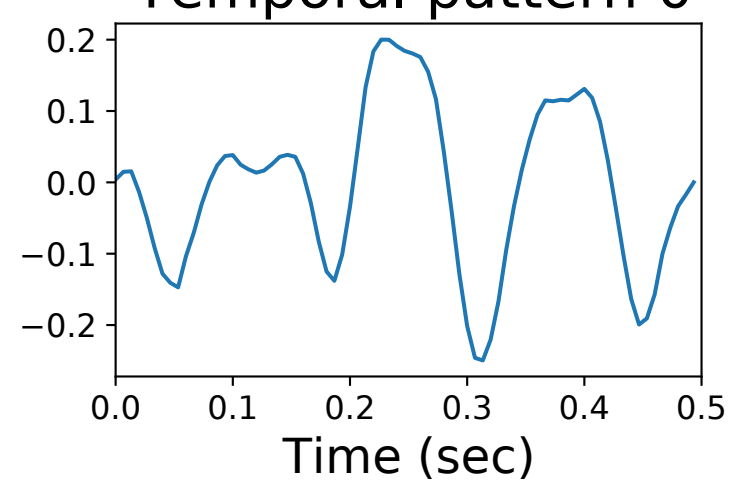

Temporal pattern 1

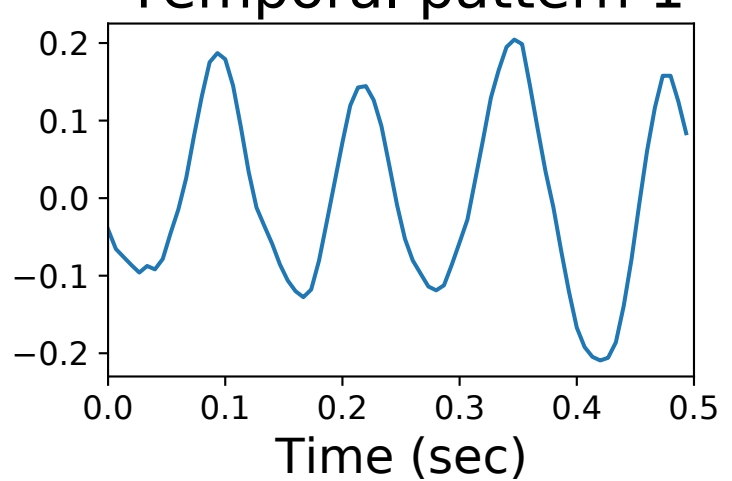

Temporal pattern 2

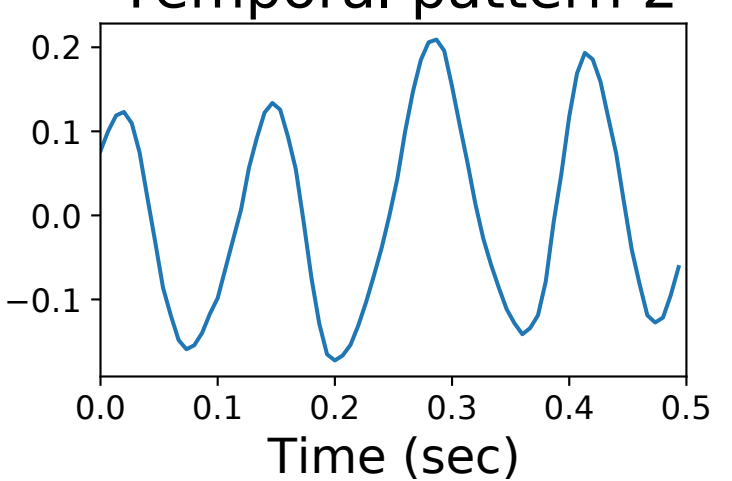

Temporal pattern 3

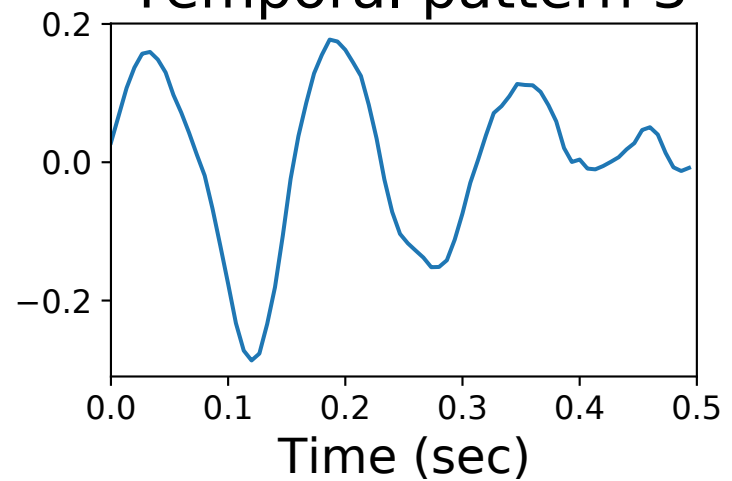

Temporal pattern 4

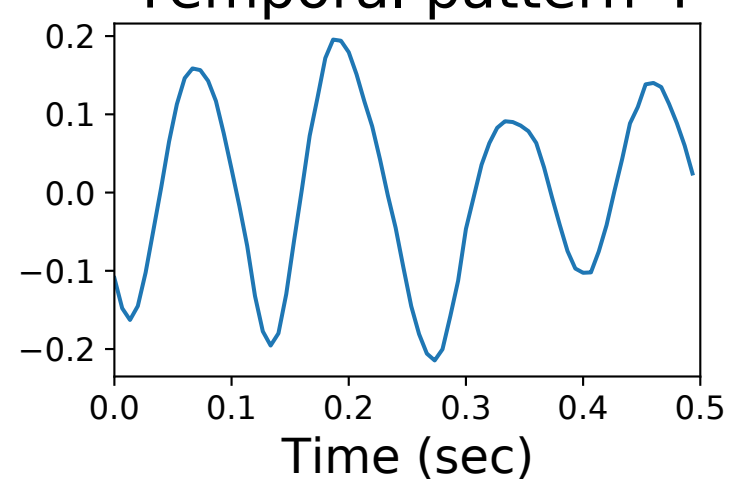

Temporal pattern 5

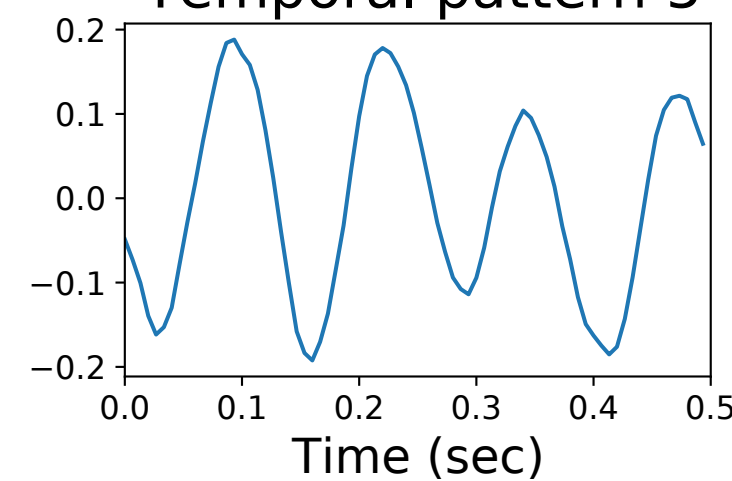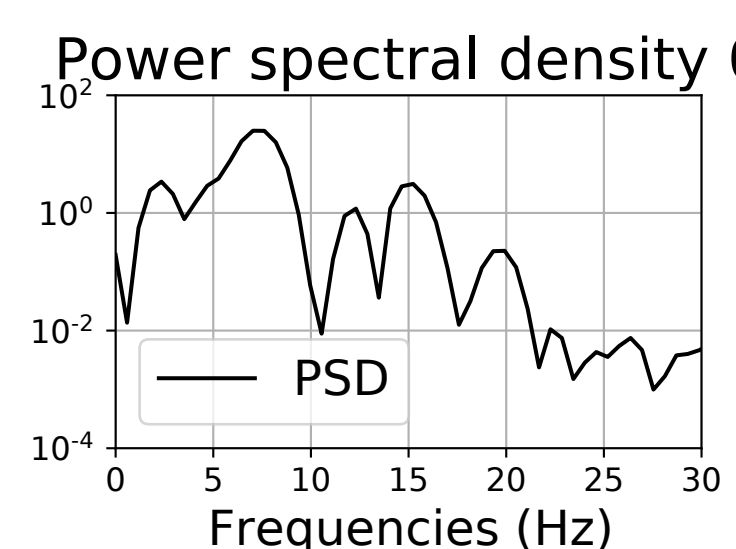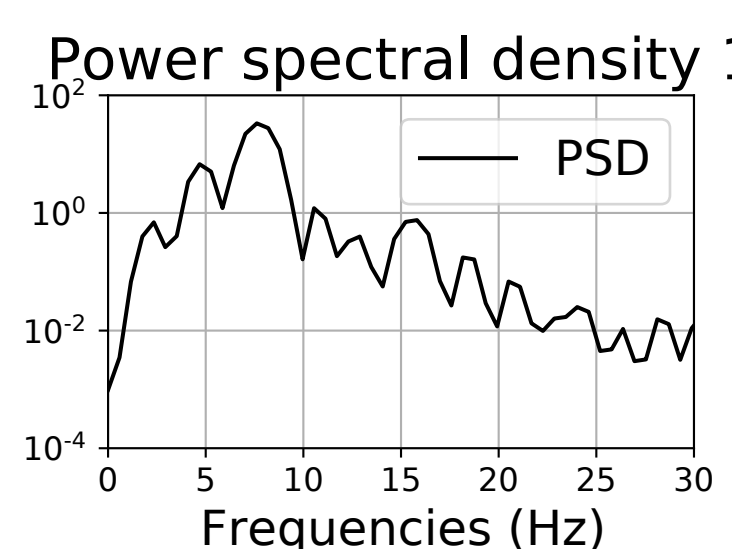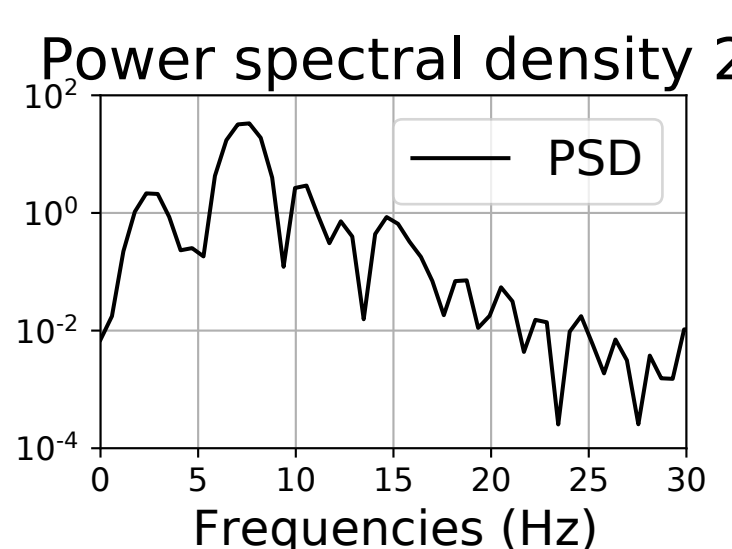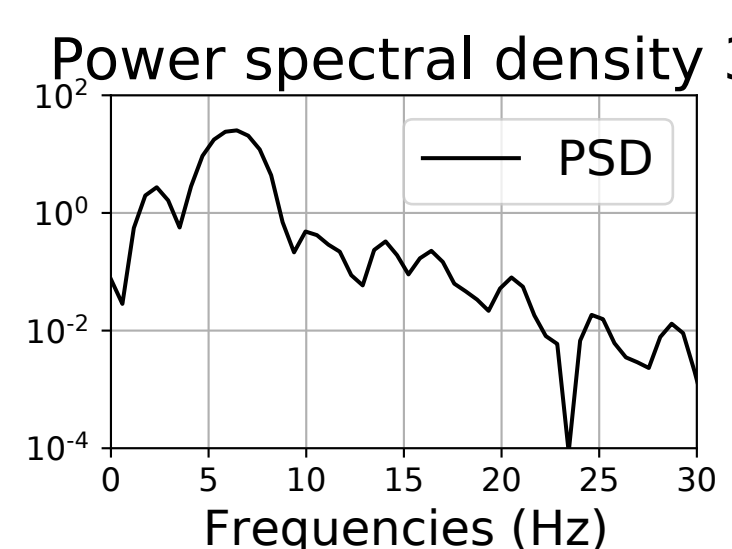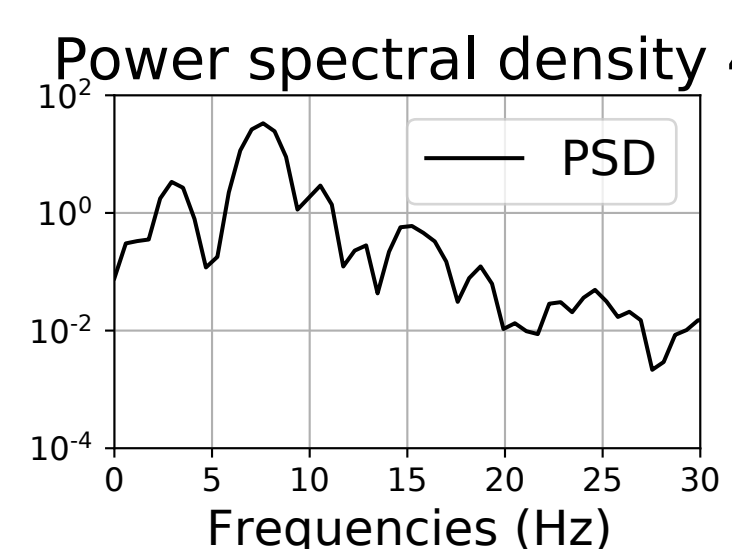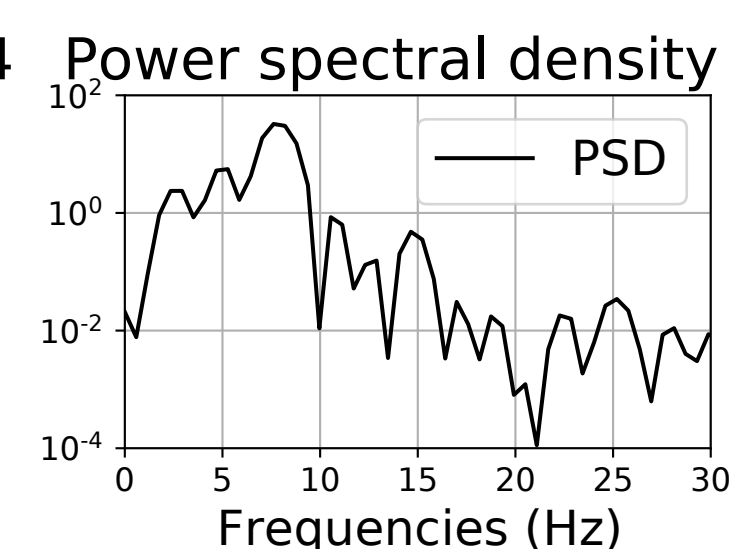

Spatial pattern 6

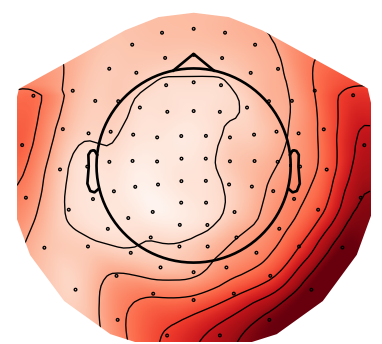

Spatial pattern 7

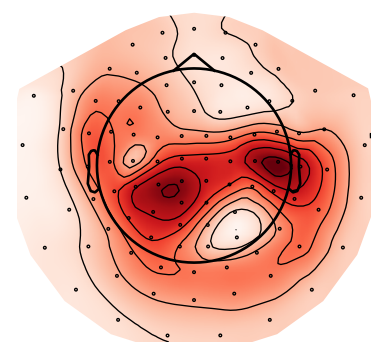

Spatial pattern 8

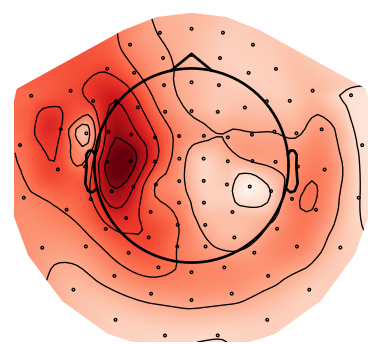

Spatial pattern 9

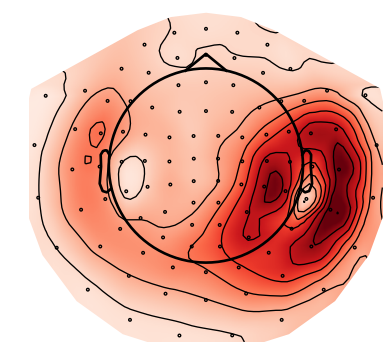

Spatial pattern 10

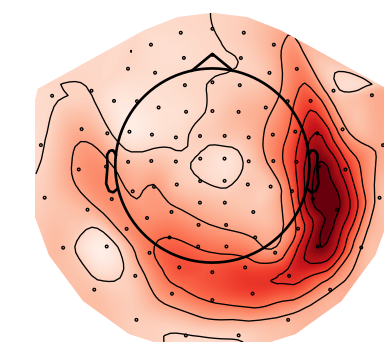

Spatial pattern 11

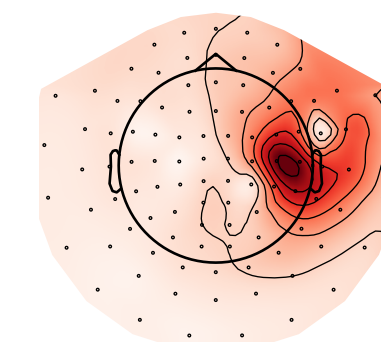

Temporal pattern 6

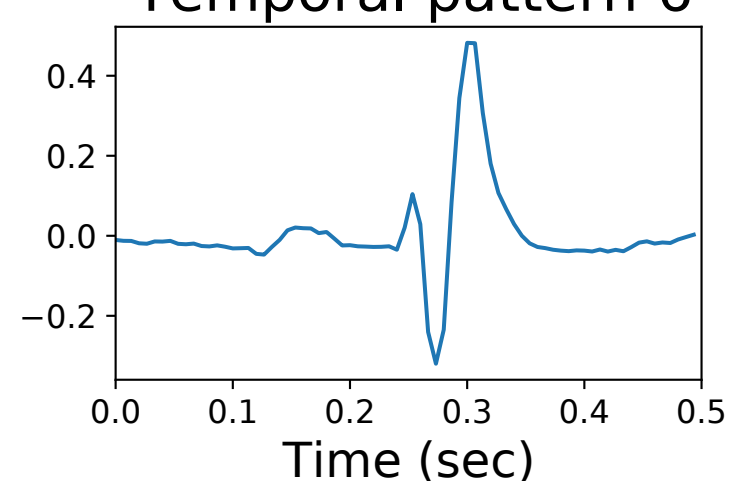

Temporal pattern 7

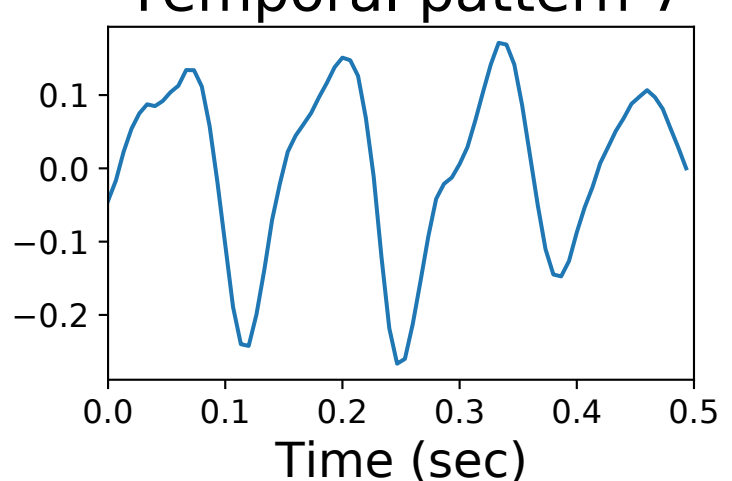

Temporal pattern 8

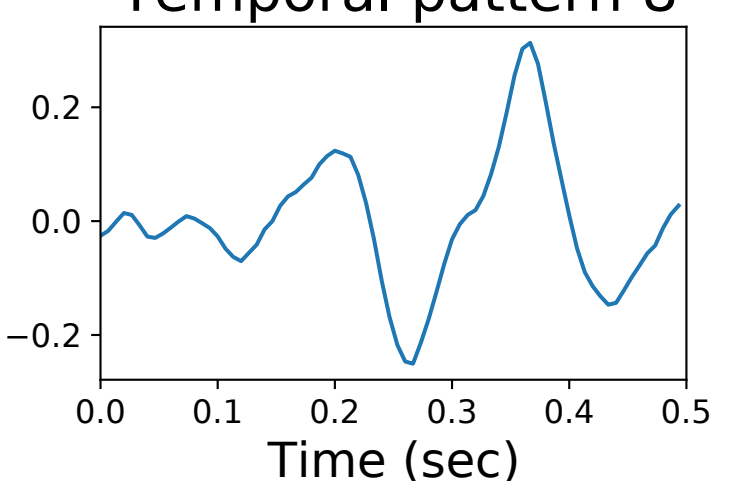

Temporal pattern 9

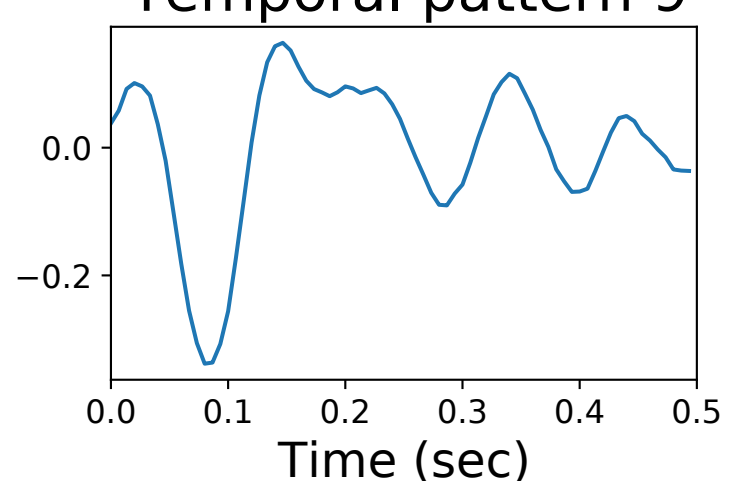

Temporal pattern 10

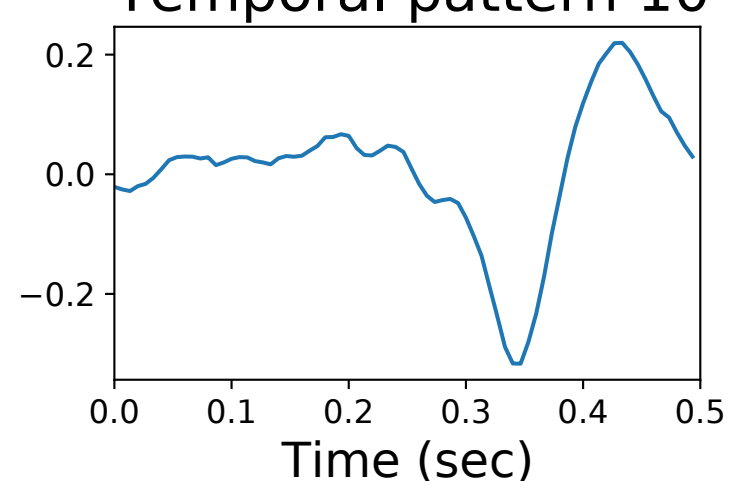

Temporal pattern 11

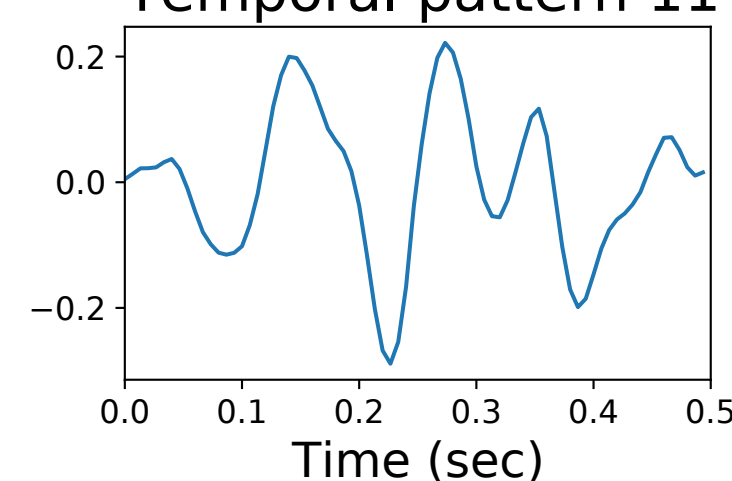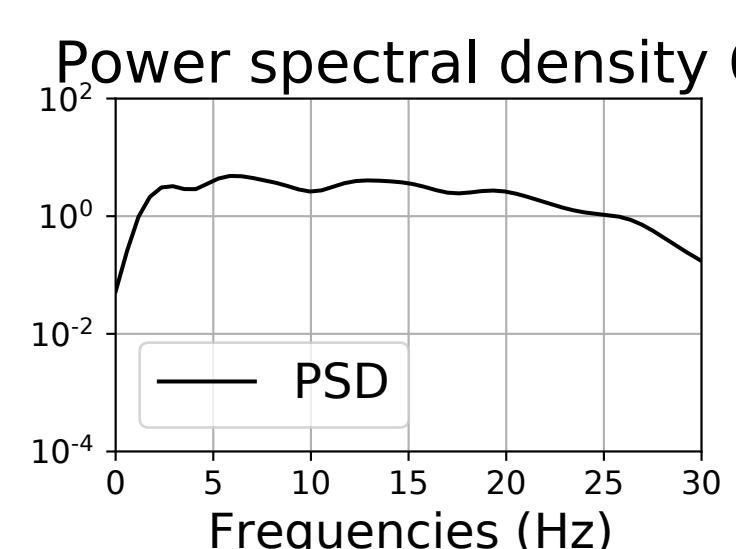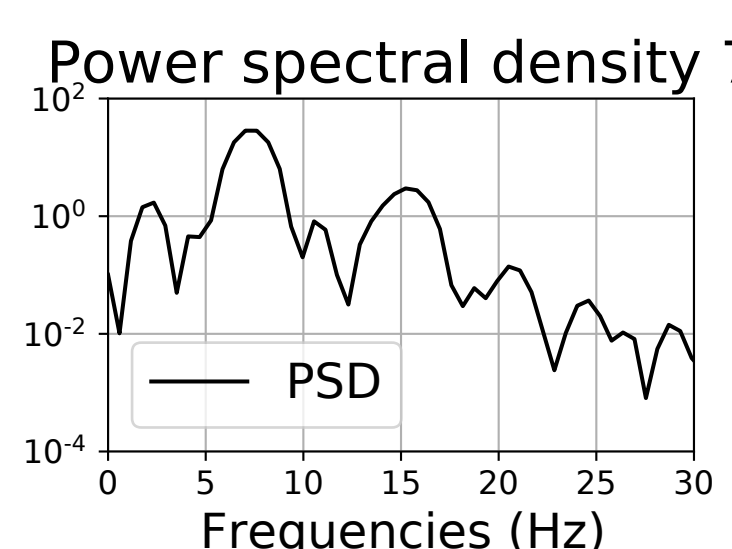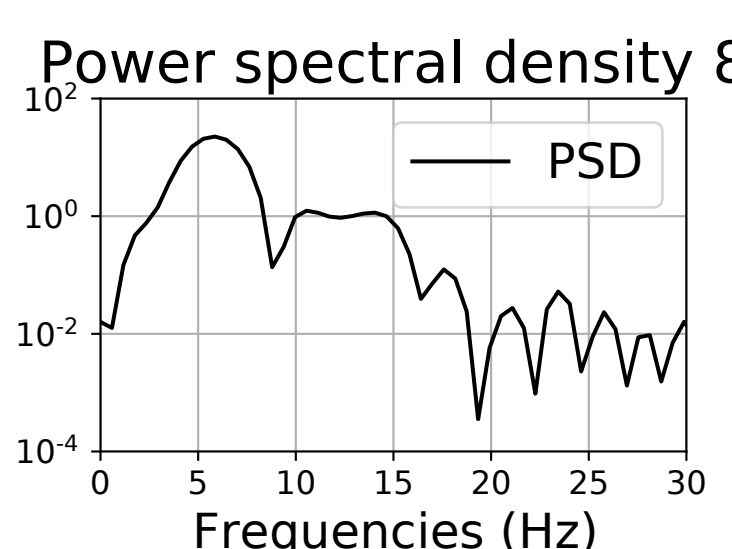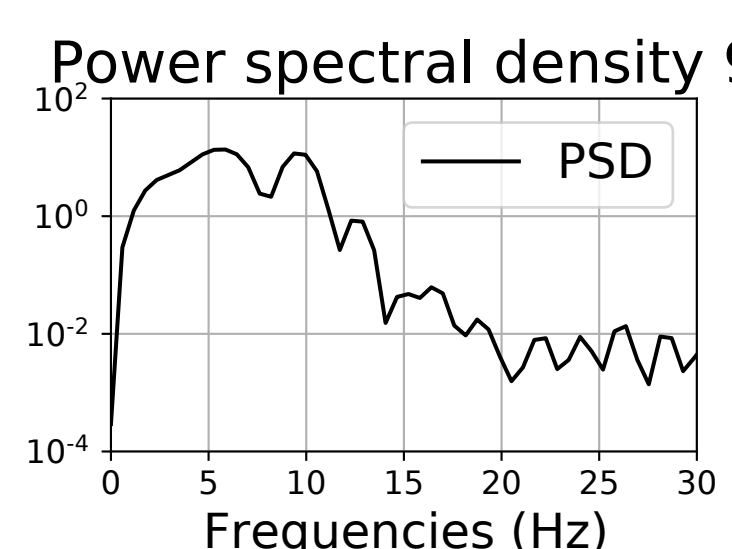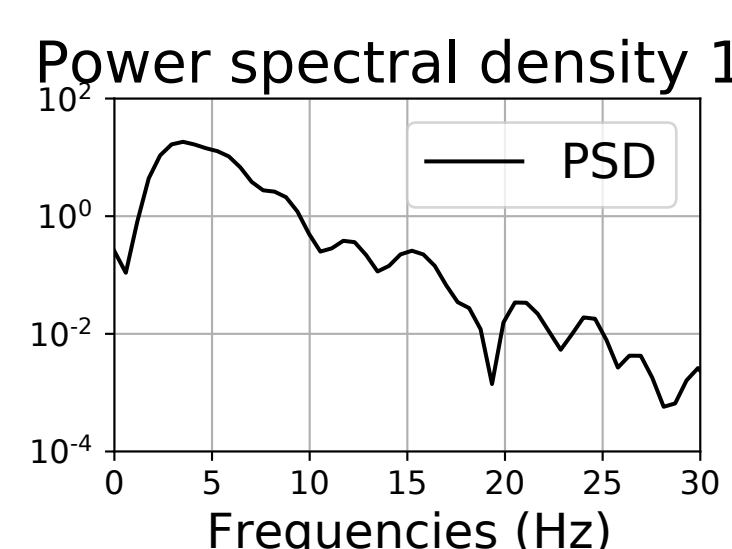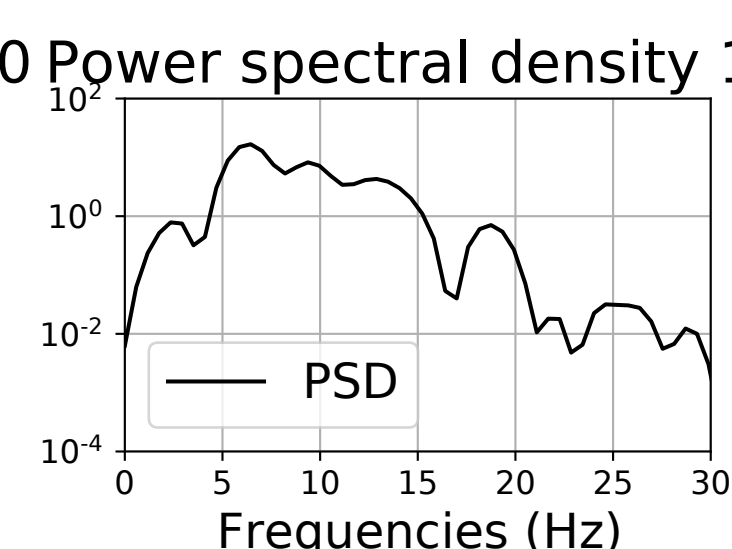

Spatial pattern 12

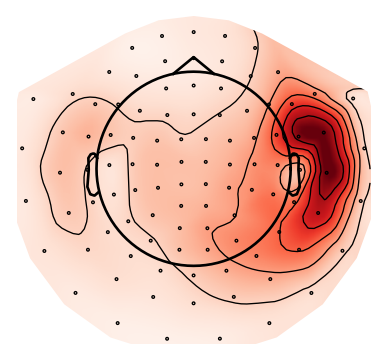

Spatial pattern 13

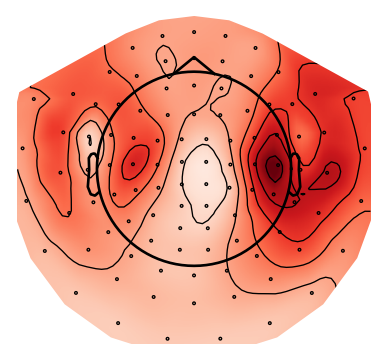

Spatial pattern 14

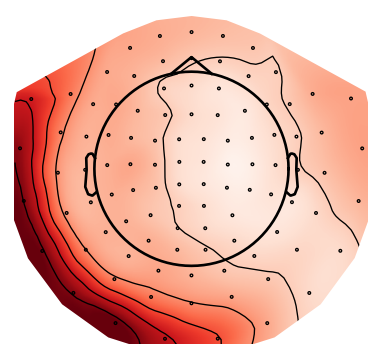

Spatial pattern 15

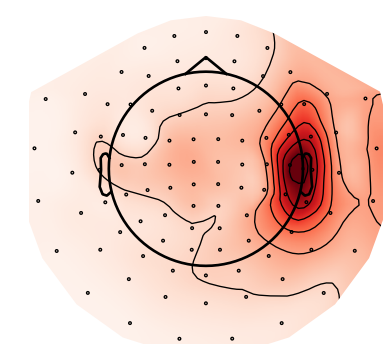

Spatial pattern 16

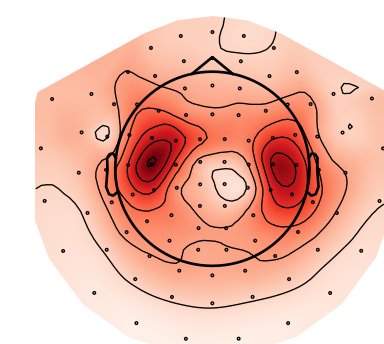

Spatial pattern 17

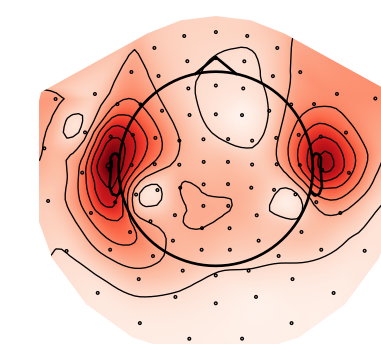

Temporal pattern 12

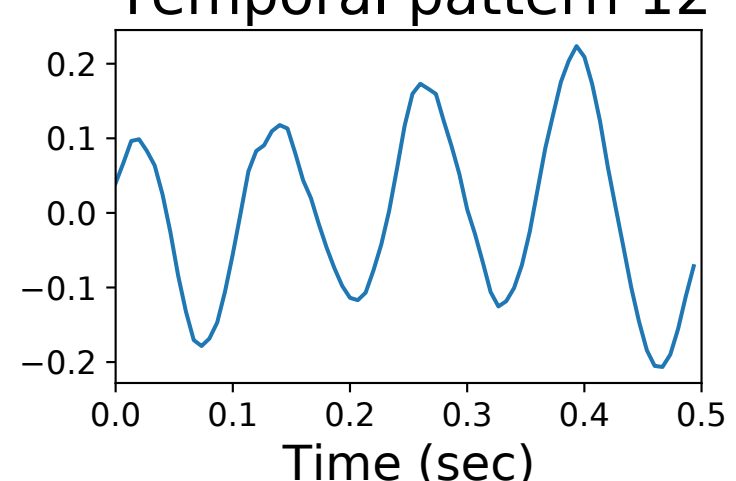

Temporal pattern 13

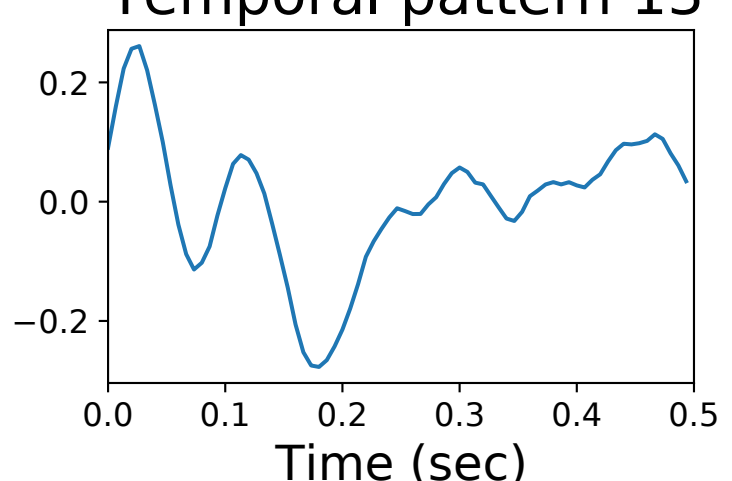

Temporal pattern 14

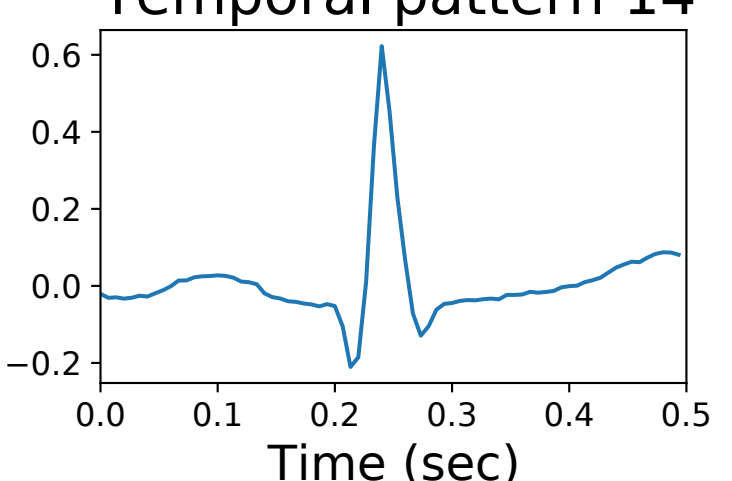

Temporal pattern 15

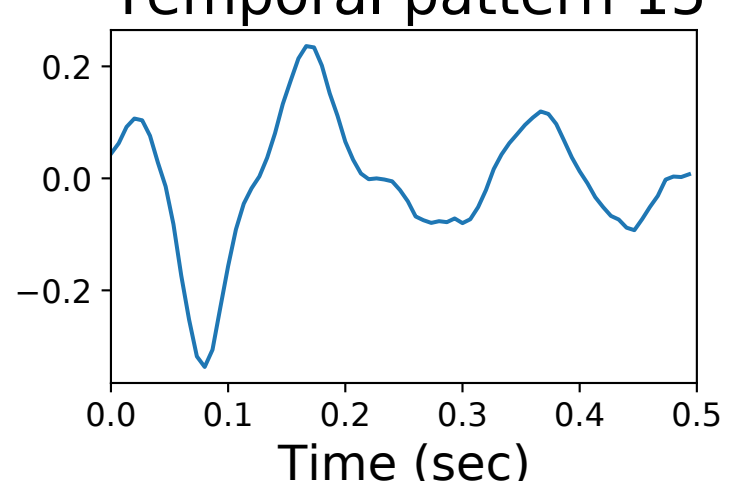

Temporal pattern 16

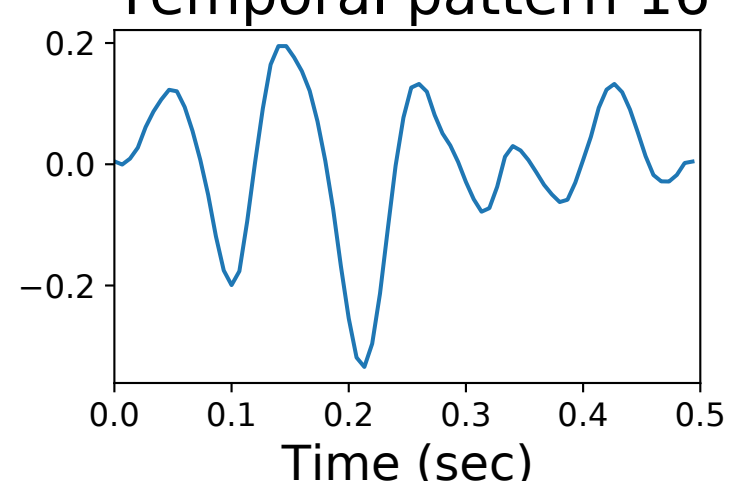

Temporal pattern 17

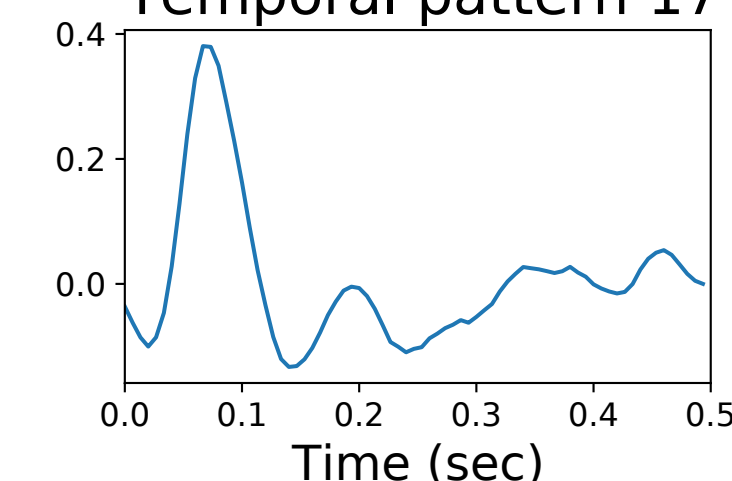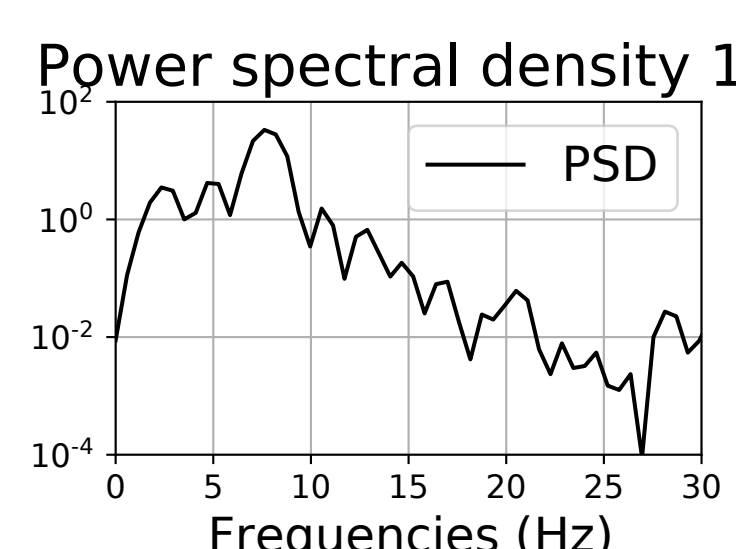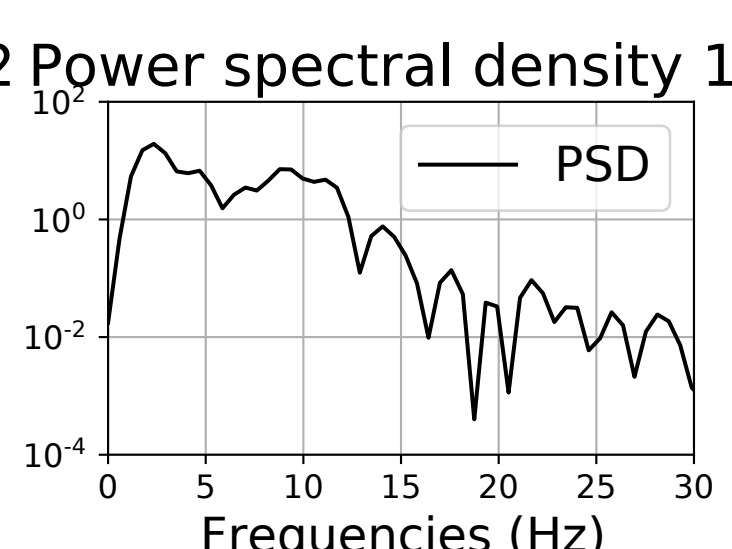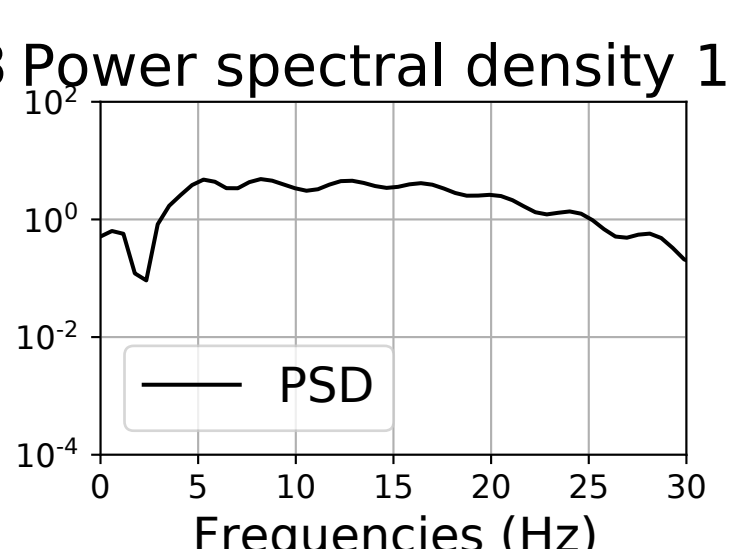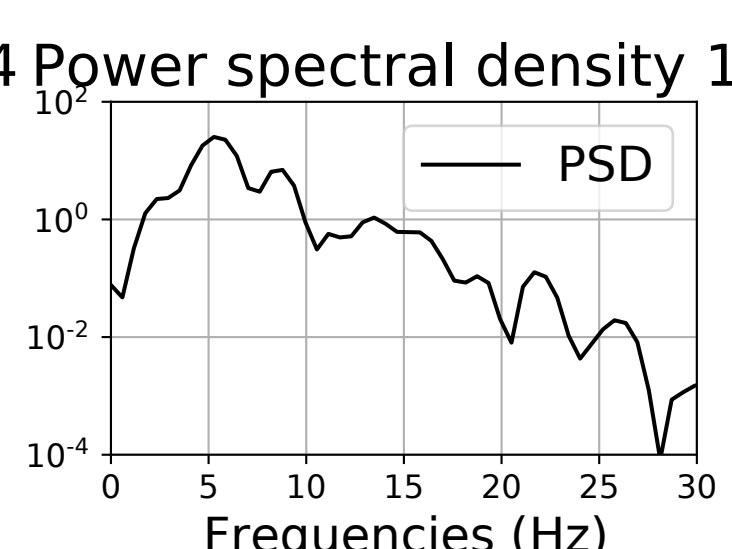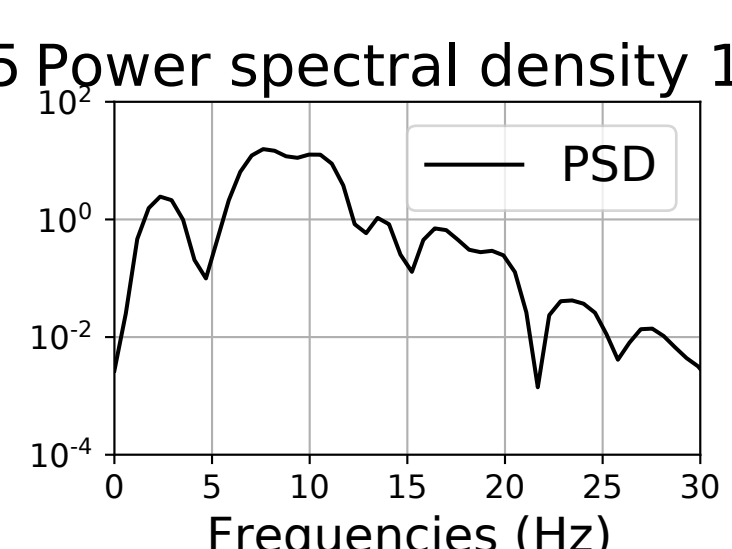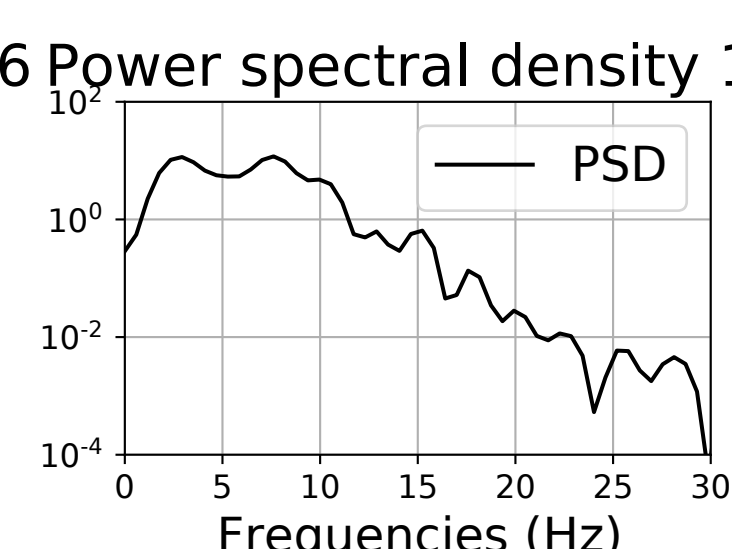

Spatial pattern 18

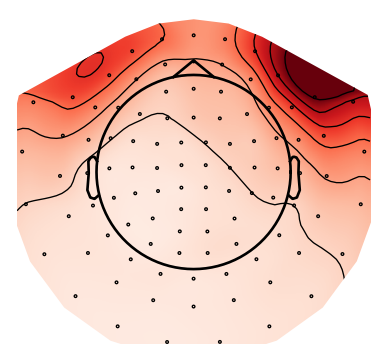

Spatial pattern 19

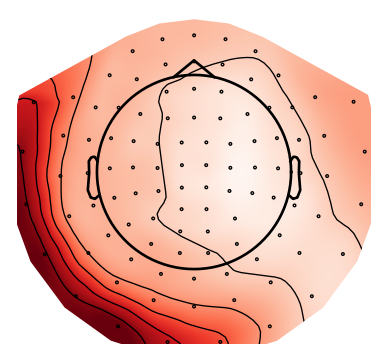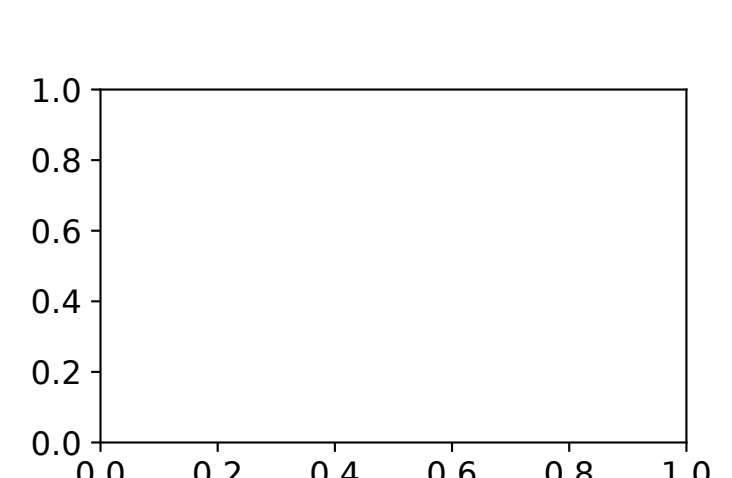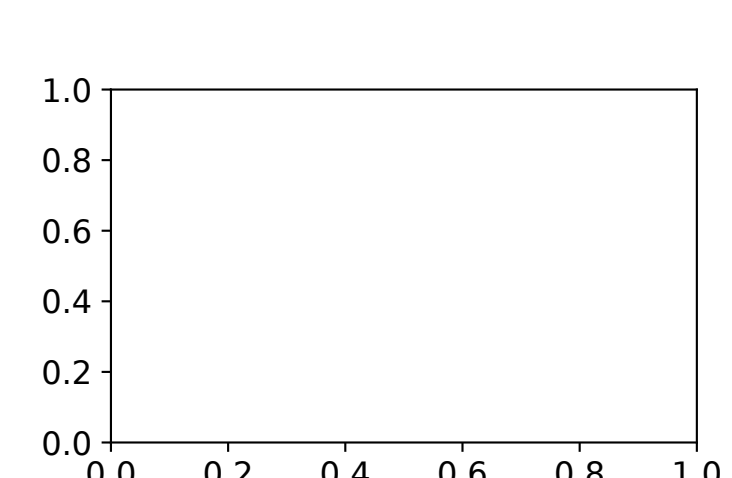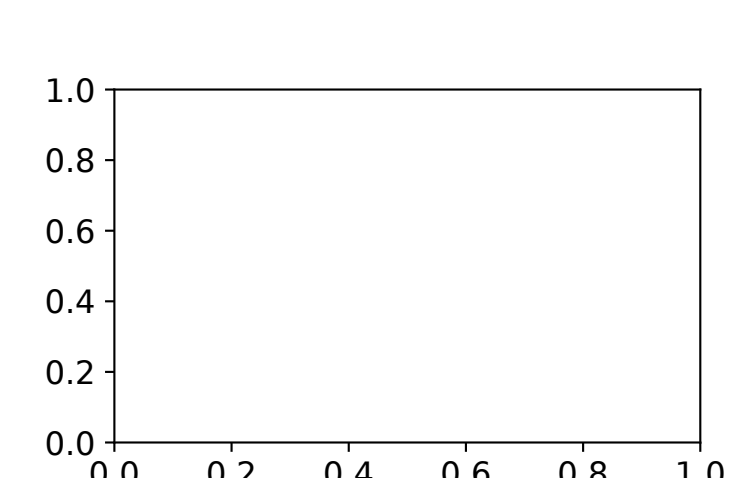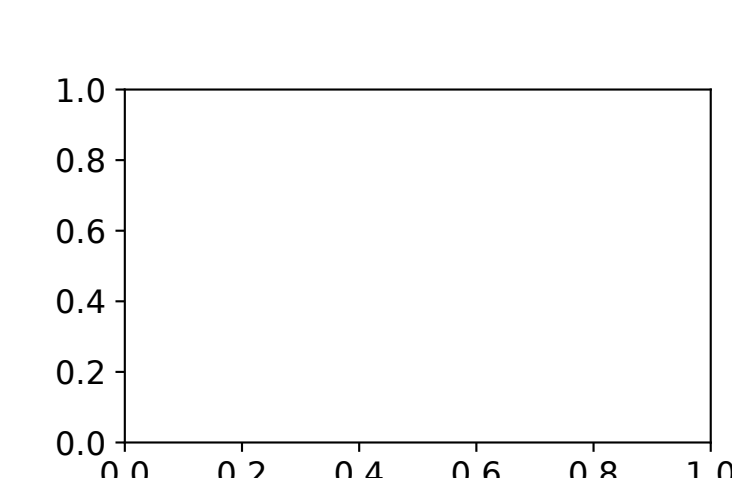

Temporal pattern 18

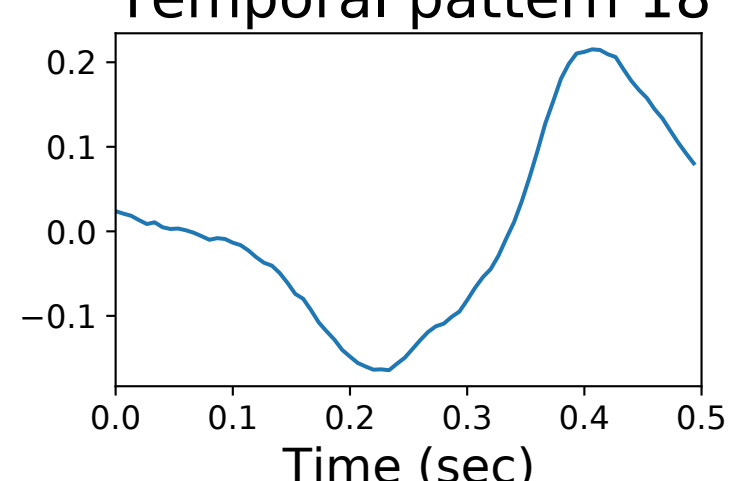

Temporal pattern 19

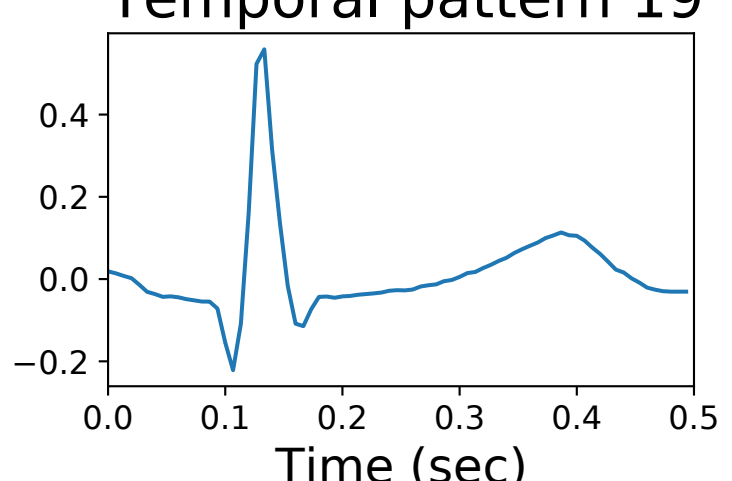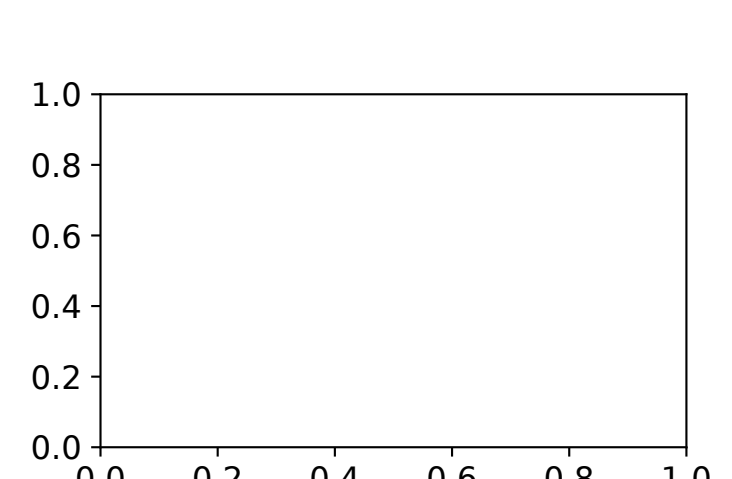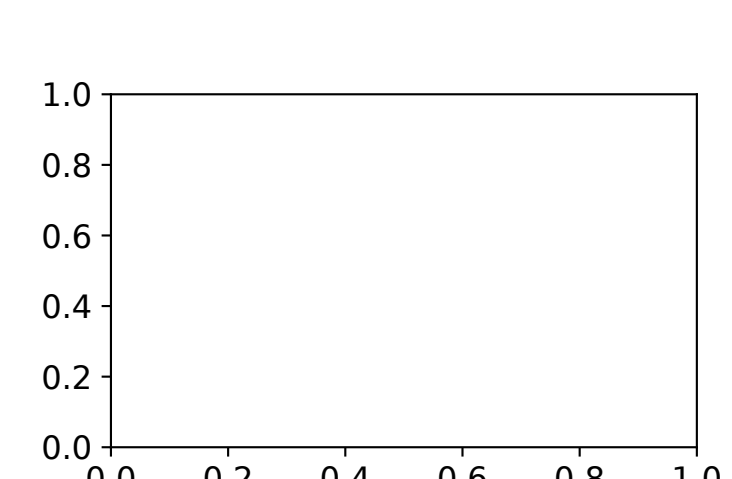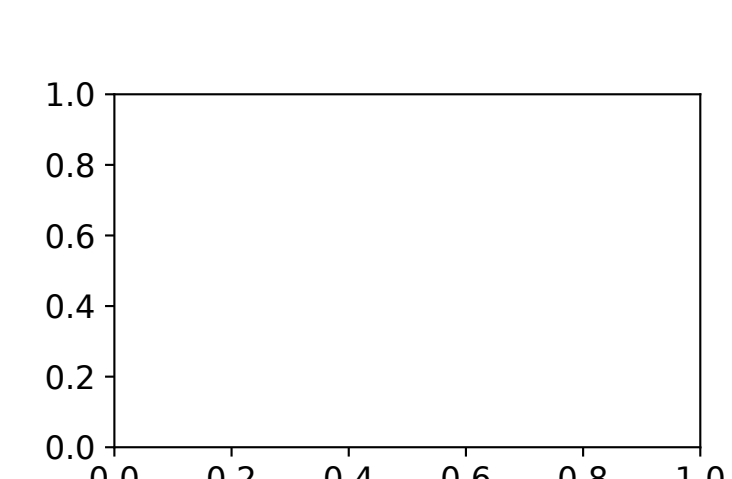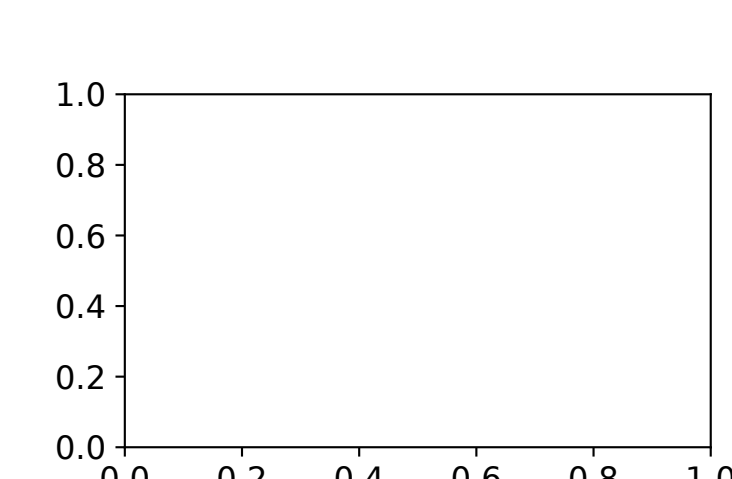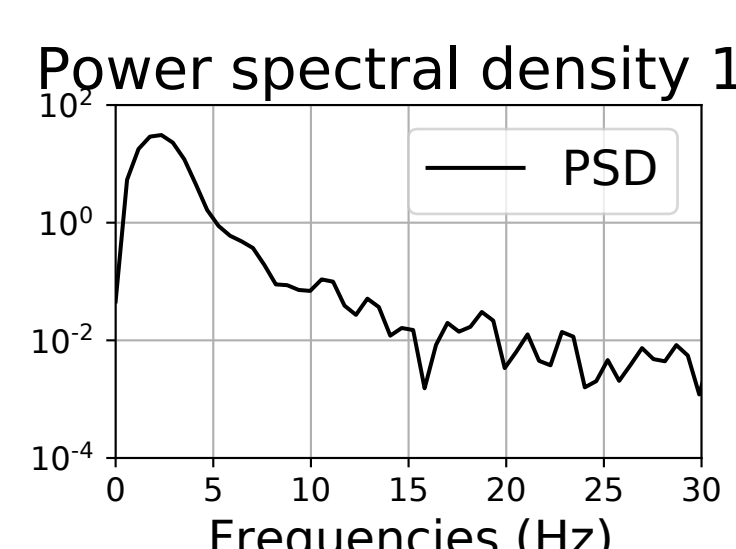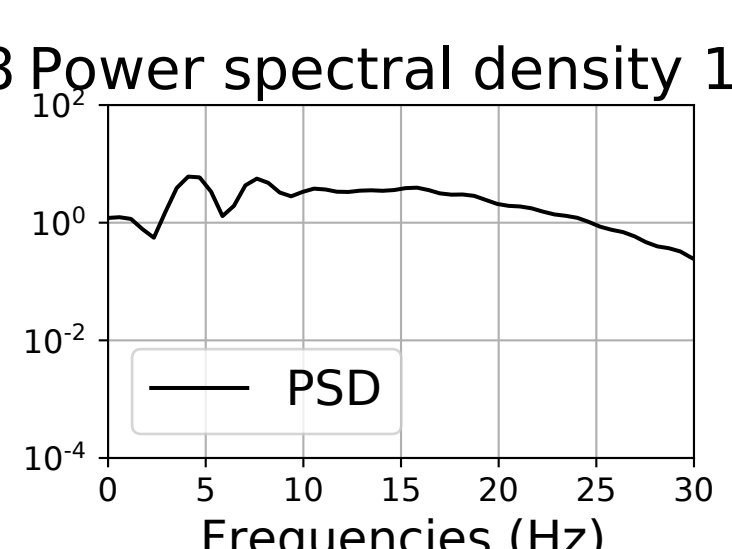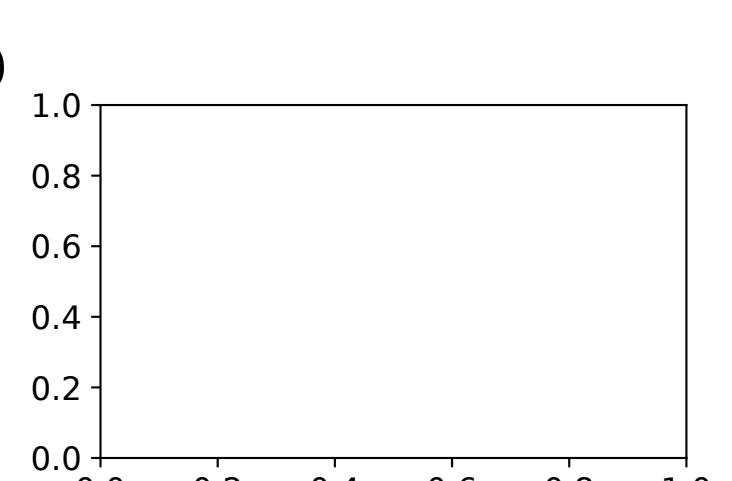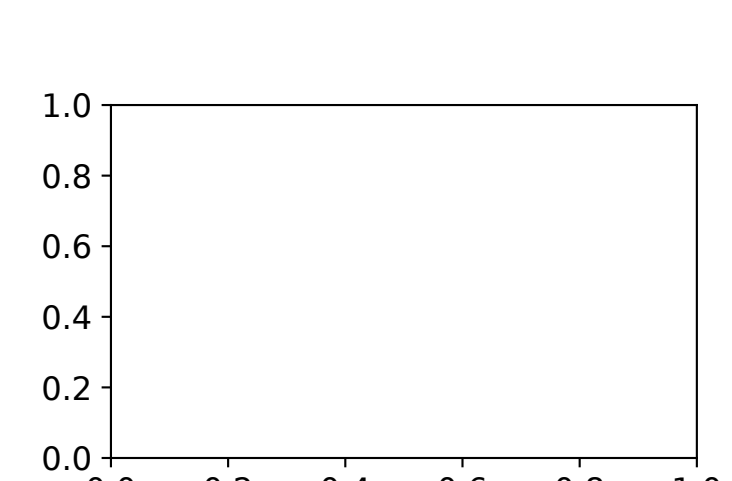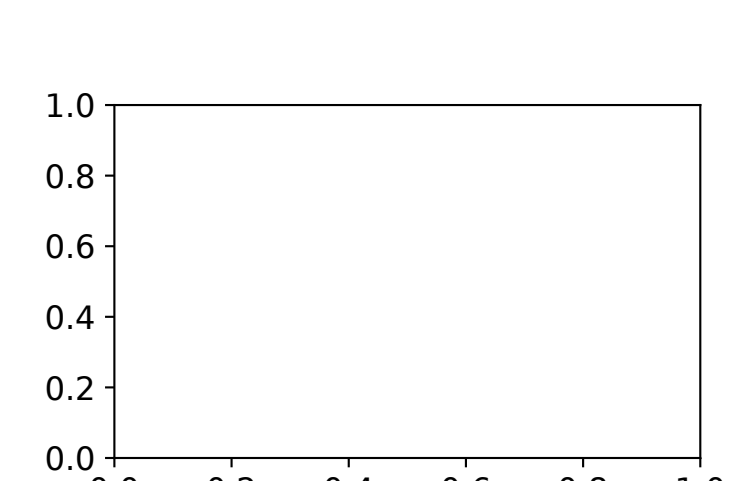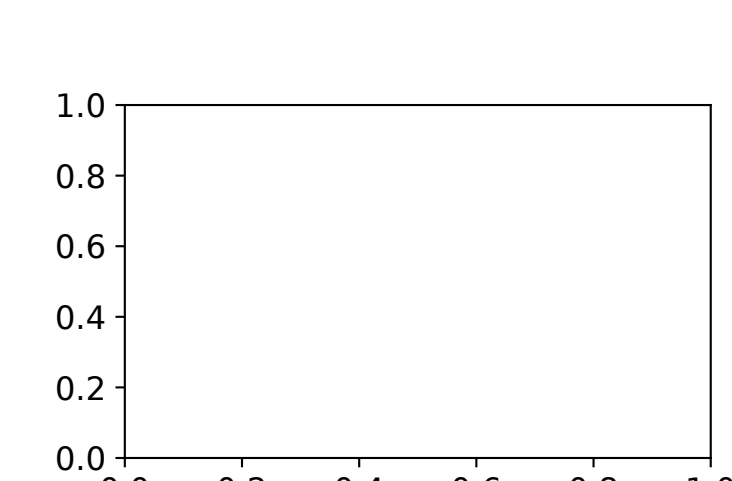

Supplement: supplementary_material [file attachment]
